# Supplementary material for: Berberine Inhibits HIV Protease Inhibitor-Induced Inflammatory Response by Modulating ER Stress Signaling Pathways in Murine Macrophages
Source: PLOS journal article supplement (doi:10.1371/journal.pone.0009069), 2010-02-08
Supplement: S1 (10.1371/journal.pone.0009069.s001) [file journal.pone.0009069.s001]

**Figure S1**

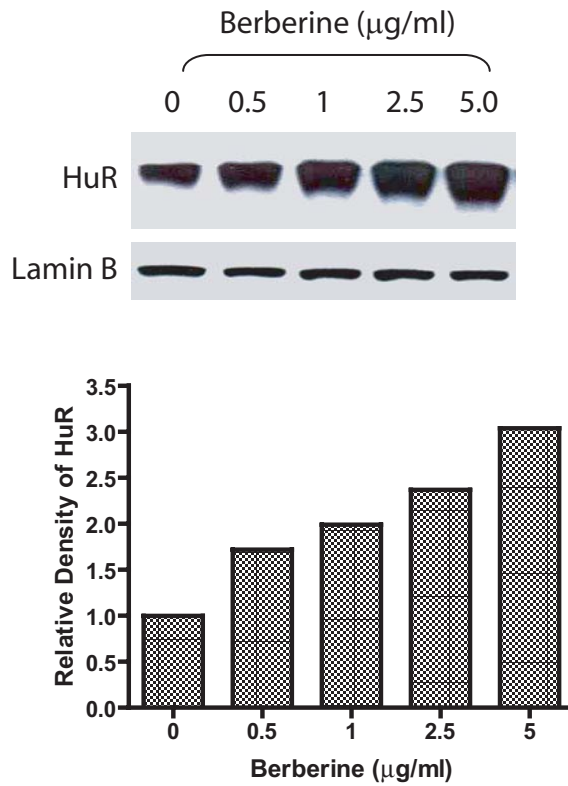

**Effect of berberine on HuR accumulation in nucleus in macrophages.**

Mouse J774A.1 cells were treated with different amount of berberine (0, 0.5, 1, 2.5, 5 µg/ml) for 24 h and the nuclear proteins were isolated. The protein levels of HuR in nucleus were determined by Western blot analysis. Lamin B was used as loading control for nuclear proteins.
